# Supplementary material for: 1.8 Å resolution structure of the cyanobacterial Photosystem I assembly intermediate lacking cytoplasmic subunits
Source: Research Square preprint supplement (doi:10.21203/rs.3.rs-4640615/v1), 2024-08-05
Supplement: Supplementary file 1 [file ab7c0ad570b7f9346cef057b.xlsx]

## Sheet: PSI C vs. dC
Accession	Entry name	Description	Protein Coverage(%) dC	#Unique Peptides dC	Protein Intensity dC	Mw	Protein Coverage(%) C	#Unique Peptides C	Protein Intensity C	Ratio C vs dC
P19569	PSAD_SYNY3	Photosystem I reaction center subunit II OS=Synechocystis sp. (strain PCC 6803 / Kazusa) OX=1111708 GN=psaD PE=1 SV=2	99.29	31	199000	15643.8	100	252	16200000	81.407
P12975	PSAE_SYNY3	Photosystem I reaction center subunit IV OS=Synechocystis sp. (strain PCC 6803 / Kazusa) OX=1111708 GN=psaE PE=1 SV=4	98.65	17	172000	8145.11	100	151	11300000	65.6977
P29255	PSAB_SYNY3	Photosystem I P700 chlorophyll a apoprotein A2 OS=Synechocystis sp. (strain PCC 6803 / Kazusa) OX=1111708 GN=psaB PE=1 SV=4	73.6	274	7750000	81292	66.07	241	7960000	1.0271
P32422	PSAC_SYNY3	Photosystem I iron-sulfur center OS=Synechocystis sp. (strain PCC 6803 / Kazusa) OX=1111708 GN=psaC PE=1 SV=2	88.89	14	71300	8828.24	100	106	5640000	79.1024
P29256	PSAF_SYNY3	Photosystem I reaction center subunit III OS=Synechocystis sp. (strain PCC 6803 / Kazusa) OX=1111708 GN=psaF PE=1 SV=1	86.06	164	6450000	18249.1	87.27	128	4880000	0.756589
P72712	PSAK1_SYNY3	Photosystem I reaction center subunit PsaK 1 OS=Synechocystis sp. (strain PCC 6803 / Kazusa) OX=1111708 GN=psaK1 PE=1 SV=1	94.19	85	5150000	8644.31	96.51	60	2860000	0.55534
P37277	PSAL_SYNY3	Photosystem I reaction center subunit XI OS=Synechocystis sp. (strain PCC 6803 / Kazusa) OX=1111708 GN=psaL PE=1 SV=1	49.68	73	1670000	16623.9	50.32	91	2590000	1.5509
P29254	PSAA_SYNY3	Photosystem I P700 chlorophyll a apoprotein A1 OS=Synechocystis sp. (strain PCC 6803 / Kazusa) OX=1111708 GN=psaA PE=1 SV=1	66.31	238	3140000	82949.7	60.45	137	2500000	0.796178
P72986	PSAM_SYNY3	Photosystem I reaction center subunit XII OS=Synechocystis sp. (strain PCC 6803 / Kazusa) OX=1111708 GN=psaM PE=1 SV=1	100	40	2400000	3380.08	100	33	1200000	0.5
Q55329	PSAJ_SYNY3	Photosystem I reaction center subunit IX OS=Synechocystis sp. (strain PCC 6803 / Kazusa) OX=1111708 GN=psaJ PE=1 SV=1	100	18	942000	4532.44	90	14	989000	1.04989
P05429	PSBB_SYNY3	Photosystem II CP47 reaction center protein OS=Synechocystis sp. (strain PCC 6803 / Kazusa) OX=1111708 GN=psbB PE=1 SV=1	73.37	152	1400000	55902.7	63.71	102	593000	0.423571
P74063	YCF3_SYNY3	Photosystem I assembly protein Ycf3 OS=Synechocystis sp. (strain PCC 6803 / Kazusa) OX=1111708 GN=ycf3 PE=3 SV=1	99.42	99	1750000	19878.2	97.69	54	500000	0.285714
P09193	PSBC_SYNY3	Photosystem II CP43 reaction center protein OS=Synechocystis sp. (strain PCC 6803 / Kazusa) OX=1111708 GN=psbC PE=1 SV=3	51.96	135	863000	50303	48.04	89	489000	0.566628
P74564	PSAK2_SYNY3	Photosystem I reaction center subunit PsaK 2 OS=Synechocystis sp. (strain PCC 6803 / Kazusa) OX=1111708 GN=psaK2 PE=1 SV=2	37.78	7	83000	9306.17	57.78	9	285000	3.43373
Q55330	PSAI_SYNY3	Photosystem I reaction center subunit VIII OS=Synechocystis sp. (strain PCC 6803 / Kazusa) OX=1111708 GN=psaI PE=1 SV=1	100	10	205000	4413.18	70	8	173000	0.843902
Q55087	CHLP_SYNY3	Geranylgeranyl diphosphate reductase OS=Synechocystis sp. (strain PCC 6803 / Kazusa) OX=1111708 GN=chlP PE=3 SV=1	81.57	53	154000	44882.7	74.69	31	157000	1.01948
P09191	PSBF_SYNY3	Cytochrome b559 subunit beta OS=Synechocystis sp. (strain PCC 6803 / Kazusa) OX=1111708 GN=psbF PE=1 SV=3	97.73	7	113000	4932.82	97.73	11	151000	1.33628
P09190	PSBE_SYNY3	Cytochrome b559 subunit alpha OS=Synechocystis sp. (strain PCC 6803 / Kazusa) OX=1111708 GN=psbE PE=1 SV=3	92.59	19	97900	9448.65	92.59	13	93100	0.95097
P74625	CPCL_SYNY3	Photosystem I-associated linker protein CpcL OS=Synechocystis sp. (strain PCC 6803 / Kazusa) OX=1111708 GN=cpcL PE=1 SV=1	71.08	49	110000	28522.6	56.22	26	80000	0.727273
P74367	PSB27_SYNY3	Photosystem II lipoprotein Psb27 OS=Synechocystis sp. (strain PCC 6803 / Kazusa) OX=1111708 GN=psb27 PE=1 SV=2	45.52	8	52700	14785.8	45.52	9	75000	1.42315
Q55356	PSB28_SYNY3	Photosystem II reaction center Psb28 protein OS=Synechocystis sp. (strain PCC 6803 / Kazusa) OX=1111708 GN=psb28 PE=1 SV=3	99.11	27	102000	12590.3	99.11	20	71100	0.697059
P73048	PSBQ_SYNY3	CyanoQ OS=Synechocystis sp. (strain PCC 6803 / Kazusa) OX=1111708 GN=psbQ PE=1 SV=1	34.9	5	15100	16477	72.48	16	64900	4.29801
P09192	PSBD_SYNY3	Photosystem II D2 protein OS=Synechocystis sp. (strain PCC 6803 / Kazusa) OX=1111708 GN=psbD PE=1 SV=2	18.47	9	37800	39492.5	11.65	7	53900	1.42593
Q55700	FTSH2_SYNY3	ATP-dependent zinc metalloprotease FtsH 2 OS=Synechocystis sp. (strain PCC 6803 / Kazusa) OX=1111708 GN=ftsH2 PE=1 SV=1	94.1	137	551000	68496.2	69.38	34	45000	0.0816697
P73452	NRTA_SYNY3	Nitrate/nitrite binding protein NrtA OS=Synechocystis sp. (strain PCC 6803 / Kazusa) OX=1111708 GN=nrtA PE=1 SV=1	77.58	43	59000	48966.6	71.08	35	40600	0.688136
P73069	YCF48_SYNY3	Photosystem II assembly lipoprotein Ycf48 OS=Synechocystis sp. (strain PCC 6803 / Kazusa) OX=1111708 GN=ycf48 PE=1 SV=1	78.07	36	78200	37290.9	53.51	21	37600	0.480818
P26287	CYF_SYNY3	Cytochrome f OS=Synechocystis sp. (strain PCC 6803 / Kazusa) OX=1111708 GN=petA PE=1 SV=1	23.17	5	3610	35230.6	38.41	16	31900	8.83657
P72991	FTSH3_SYNY3	ATP-dependent zinc metalloprotease FtsH 3 OS=Synechocystis sp. (strain PCC 6803 / Kazusa) OX=1111708 GN=ftsH3 PE=1 SV=1	72.24	111	407000	67250.4	49.84	20	29200	0.0717445
Q54714	PHCB_SYNY3	C-phycocyanin beta subunit OS=Synechocystis sp. (strain PCC 6803 / Kazusa) OX=1111708 GN=cpcB PE=1 SV=2	84.3	30	170000	18126.5	31.98	9	29100	0.171176
P16033	PSBA2_SYNY3	Photosystem II protein D1 2 OS=Synechocystis sp. (strain PCC 6803 / Kazusa) OX=1111708 GN=psbA2 PE=1 SV=1	28.89	10	20500	39721.4	33.06	7	21000	1.02439
P14660	PSBA_SYNY4	Photosystem II protein D1 OS=Synechocystis sp. (strain PCC 6714) OX=1147 GN=psbA PE=1 SV=1	28.89	10	20500	39811.5	33.06	7	21000	1.02439
P74067	PSB34_SYNY3	Photosystem II assembly protein Psb34 OS=Synechocystis sp. (strain PCC 6803 / Kazusa) OX=1111708 GN=psb34 PE=1 SV=1	83.61	4	31800	6399.34	83.61	4	18000	0.566038
P72827	FUTA1_SYNY3	Iron uptake protein A1 OS=Synechocystis sp. (strain PCC 6803 / Kazusa) OX=1111708 GN=futA1 PE=1 SV=1	46.67	21	23800	39370.2	26.67	8	13000	0.546218
Q54715	PHCA_SYNY3	C-phycocyanin alpha subunit OS=Synechocystis sp. (strain PCC 6803 / Kazusa) OX=1111708 GN=cpcA PE=1 SV=1	89.51	30	88700	17586.6	50	6	13000	0.146561
P73203	PYR1_SYNY3	Phycobilisome 32.1 kDa linker polypeptide, phycocyanin-associated, rod 1 OS=Synechocystis sp. (strain PCC 6803 / Kazusa) OX=1111708 GN=cpcC1 PE=1 SV=3	91.41	41	94700	32520.7	50.52	12	12000	0.126716
P72704	PPI1_SYNY3	Probable peptidyl-prolyl cis-trans isomerase sll0227 OS=Synechocystis sp. (strain PCC 6803 / Kazusa) OX=1111708 GN=sll0227 PE=3 SV=1	53.25	24	34500	26580	42.68	12	11600	0.336232
P26290	UCRIB_SYNY3	Cytochrome b6-f complex iron-sulfur subunit 2 OS=Synechocystis sp. (strain PCC 6803 / Kazusa) OX=1111708 GN=petC2 PE=1 SV=2	83.33	14	9890	18996.3	65	8	11100	1.12235
P27179	ATPA_SYNY3	ATP synthase subunit alpha OS=Synechocystis sp. (strain PCC 6803 / Kazusa) OX=1111708 GN=atpA PE=3 SV=1	51.69	21	23700	53965.6	40.16	13	9550	0.402954
P72804	Y1796_SYNY3	Thylakoid membrane protein slr1796 OS=Synechocystis sp. (strain PCC 6803 / Kazusa) OX=1111708 GN=slr1796 PE=4 SV=1	77.11	149	4260000	22968.5	61.19	12	9430	0.00221362
P54206	RBS_SYNY3	Ribulose bisphosphate carboxylase small subunit OS=Synechocystis sp. (strain PCC 6803 / Kazusa) OX=1111708 GN=cbbS PE=1 SV=1	82.3	11	16900	13239	77.88	9	9160	0.542012
Q06474	COX2_SYNY3	Cytochrome c oxidase subunit 2 OS=Synechocystis sp. (strain PCC 6803 / Kazusa) OX=1111708 GN=ctaC PE=3 SV=2	26.2	7	1870	35917.3	26.81	7	8720	4.6631
P72705	YCF4_SYNY3	Photosystem I assembly protein Ycf4 OS=Synechocystis sp. (strain PCC 6803 / Kazusa) OX=1111708 GN=ycf4 PE=3 SV=1	55.32	26	119000	20453.7	35.11	8	8620	0.072437
Q55247	GLNB_SYNY3	Nitrogen regulatory protein P-II OS=Synechocystis sp. (strain PCC 6803 / Kazusa) OX=1111708 GN=glnB PE=1 SV=1	81.25	25	61600	12397.4	74.11	8	8220	0.133442
P10549	PSBO_SYNY3	Photosystem II extrinsic protein O OS=Synechocystis sp. (strain PCC 6803 / Kazusa) OX=1111708 GN=psbO PE=1 SV=1	56.57	12	18100	29911.7	35.04	8	7510	0.414917
P26527	ATPB_SYNY3	ATP synthase subunit beta OS=Synechocystis sp. (strain PCC 6803 / Kazusa) OX=1111708 GN=atpD PE=3 SV=1	64.18	37	37900	51733	20.29	9	7380	0.194723
P73293	RS9_SYNY3	Small ribosomal subunit protein uS9 OS=Synechocystis sp. (strain PCC 6803 / Kazusa) OX=1111708 GN=rpsI PE=3 SV=1	91.24	20	215000	15086.3	49.64	5	7150	0.0332558
P80507	IPYR_SYNY3	Inorganic pyrophosphatase OS=Synechocystis sp. (strain PCC 6803 / Kazusa) OX=1111708 GN=ppa PE=1 SV=2	96.45	22	40400	19088	89.94	9	6750	0.167079
P73636	RS6_SYNY3	Small ribosomal subunit protein bS6 OS=Synechocystis sp. (strain PCC 6803 / Kazusa) OX=1111708 GN=rpsF PE=3 SV=1	94.69	34	145000	13237.3	53.98	7	6560	0.0452414
Q01952	APCB_SYNY3	Allophycocyanin beta chain OS=Synechocystis sp. (strain PCC 6803 / Kazusa) OX=1111708 GN=apcB PE=1 SV=1	45.34	3	81900	17215.6	39.75	4	6180	0.0754579
P36236	RL1_SYNY3	Large ribosomal subunit protein uL1 OS=Synechocystis sp. (strain PCC 6803 / Kazusa) OX=1111708 GN=rplA PE=3 SV=1	89.92	48	272000	25851.8	32.35	5	5090	0.0187132
P73320	RL3_SYNY3	Large ribosomal subunit protein uL3 OS=Synechocystis sp. (strain PCC 6803 / Kazusa) OX=1111708 GN=rplC PE=3 SV=1	51.17	24	96100	22741.1	37.56	9	4750	0.0494277
P27320	FER_SYNY3	Ferredoxin-1 OS=Synechocystis sp. (strain PCC 6803 / Kazusa) OX=1111708 GN=petF PE=1 SV=2	42.27	6	10400	10363.3	40.21	4	4650	0.447115
P73068	RUBR_SYNY3	Rubredoxin OS=Synechocystis sp. (strain PCC 6803 / Kazusa) OX=1111708 GN=rub PE=3 SV=1	69.57	9	14000	12570.4	37.39	2	3800	0.271429
P73315	RL22_SYNY3	Large ribosomal subunit protein uL22 OS=Synechocystis sp. (strain PCC 6803 / Kazusa) OX=1111708 GN=rplV PE=3 SV=1	86.78	22	126000	13501.8	51.24	6	3770	0.0299206
P73437	FTSH4_SYNY3	ATP-dependent zinc metalloprotease FtsH 4 OS=Synechocystis sp. (strain PCC 6803 / Kazusa) OX=1111708 GN=ftsH4 PE=2 SV=1	87.26	133	413000	68199.3	18.95	7	3460	0.00837772
Q01903	SUBI_SYNY3	Sulfate-binding protein OS=Synechocystis sp. (strain PCC 6803 / Kazusa) OX=1111708 GN=sbpA PE=2 SV=1					15.06	3	3360	#DIV/0!
P73690	YC51L_SYNY3	Ycf51-like protein OS=Synechocystis sp. (strain PCC 6803 / Kazusa) OX=1111708 GN=sll1702 PE=3 SV=1	60	70	955000	19077.2	22.94	4	3190	0.00334031
P72655	Y1128_SYNY3	Uncharacterized protein slr1128 OS=Synechocystis sp. (strain PCC 6803 / Kazusa) OX=1111708 GN=slr1128 PE=3 SV=1	38.01	10	12400	35727.1	27.1	6	3090	0.249194
P73318	RL23_SYNY3	Large ribosomal subunit protein uL23 OS=Synechocystis sp. (strain PCC 6803 / Kazusa) OX=1111708 GN=rplW PE=3 SV=1	82.18	15	161000	11525.7	32.67	3	2890	0.0179503
P73563	HLIC_SYNY3	High light-inducible protein HliC OS=Synechocystis sp. (strain PCC 6803 / Kazusa) OX=1111708 GN=hliC PE=1 SV=2	87.23	7	10900	5149.91	23.4	2	2750	0.252294
P29107	ILVC_SYNY3	Ketol-acid reductoisomerase (NADP(+)) OS=Synechocystis sp. (strain PCC 6803 / Kazusa) OX=1111708 GN=ilvC PE=1 SV=3	49.24	15	11900	35821.9	20.24	5	2720	0.228571
P07826	PSBA1_SYNY3	Photosystem II protein D1 1 OS=Synechocystis sp. (strain PCC 6803 / Kazusa) OX=1111708 GN=psbA1 PE=1 SV=3	9.17	3	2970	39650.6	6.67	2	2430	0.818182
P54147	Y108_SYNY3	Putative ammonium transporter sll0108 OS=Synechocystis sp. (strain PCC 6803 / Kazusa) OX=1111708 GN=sll0108 PE=3 SV=1	6.71	5	35200	53580.3	6.71	4	2280	0.0647727
Q01951	PHAA_SYNY3	Allophycocyanin alpha chain OS=Synechocystis sp. (strain PCC 6803 / Kazusa) OX=1111708 GN=apcA PE=1 SV=3	89.44	42	189000	17411.8	21.74	2	2140	0.0113228
P73307	RS8_SYNY3	Small ribosomal subunit protein uS8 OS=Synechocystis sp. (strain PCC 6803 / Kazusa) OX=1111708 GN=rpsH PE=3 SV=1	97.74	22	120000	14666.2	21.8	2	2140	0.0178333
Q02923	PHAA_SYNY4	Allophycocyanin alpha chain OS=Synechocystis sp. (strain PCC 6714) OX=1147 GN=apcA PE=3 SV=2	85.09	37	176000	17354.7	21.74	2	2140	0.0121591
P74155	YIDC_SYNY3	Membrane protein insertase YidC OS=Synechocystis sp. (strain PCC 6803 / Kazusa) OX=1111708 GN=yidC PE=1 SV=1	13.8	4	21700	42626.7	13.8	4	2020	0.0930876
P73952	PSBP_SYNY3	CyanoP OS=Synechocystis sp. (strain PCC 6803 / Kazusa) OX=1111708 GN=psbP PE=1 SV=1	12.23	2	1910	20747.2	36.17	4	2000	1.04712
P72851	RL28_SYNY3	Large ribosomal subunit protein bL28 OS=Synechocystis sp. (strain PCC 6803 / Kazusa) OX=1111708 GN=rpmB PE=3 SV=1	60.26	7	70700	8993.49	30.77	2	1870	0.0264498
Q02924	APCB_SYNY4	Allophycocyanin beta chain OS=Synechocystis sp. (strain PCC 6714) OX=1147 GN=apcB PE=3 SV=1					21.12	3	1690	#DIV/0!
P73303	RL15_SYNY3	Large ribosomal subunit protein uL15 OS=Synechocystis sp. (strain PCC 6803 / Kazusa) OX=1111708 GN=rplO PE=3 SV=1	48.98	14	48000	15194.6	31.29	3	1670	0.0347917
P73308	RL5_SYNY3	Large ribosomal subunit protein uL5 OS=Synechocystis sp. (strain PCC 6803 / Kazusa) OX=1111708 GN=rplE PE=3 SV=2	99.44	50	229000	20230.4	50.56	5	1610	0.00703057
P74266	RL21_SYNY3	Large ribosomal subunit protein bL21 OS=Synechocystis sp. (strain PCC 6803 / Kazusa) OX=1111708 GN=rplU PE=3 SV=1	84.68	10	26500	13668.8	48.39	4	1600	0.0603774
P72761	CCMK2_SYNY3	Carboxysome shell protein CcmK2 OS=Synechocystis sp. (strain PCC 6803 / Kazusa) OX=1111708 GN=ccmK2 PE=1 SV=3	99.03	9	29700	11134.7	29.13	2	1320	0.0444444
P72866	RS15_SYNY3	Small ribosomal subunit protein uS15 OS=Synechocystis sp. (strain PCC 6803 / Kazusa) OX=1111708 GN=rpsO PE=3 SV=1	84.27	11	51200	10373.1	57.3	3	1320	0.0257812
Q55837	Y516_SYNY3	Uncharacterized protein slr0516 OS=Synechocystis sp. (strain PCC 6803 / Kazusa) OX=1111708 GN=slr0516 PE=4 SV=1	21.69	2	716	17867	28.31	3	1270	1.77374
P74227	EFTU_SYNY3	Elongation factor Tu OS=Synechocystis sp. (strain PCC 6803 / Kazusa) OX=1111708 GN=tuf PE=1 SV=1	91.48	65	340000	43733	13.03	4	1200	0.00352941
Q55664	ALF2_SYNY3	Fructose-bisphosphate aldolase class 2 OS=Synechocystis sp. (strain PCC 6803 / Kazusa) OX=1111708 GN=fbaA PE=1 SV=3	82.73	47	59700	38972	22.84	4	1150	0.019263
P72575	PSBX_SYNY3	Photosystem II reaction center protein X OS=Synechocystis sp. (strain PCC 6803 / Kazusa) OX=1111708 GN=psbX PE=1 SV=1					48.72	2	1100	#DIV/0!
P73204	PYR2_SYNY3	Phycobilisome 32.1 kDa linker polypeptide, phycocyanin-associated, rod 2 OS=Synechocystis sp. (strain PCC 6803 / Kazusa) OX=1111708 GN=cpcC2 PE=1 SV=1	77.66	23	20700	30797.4	10.99	2	927	0.0447826
P54205	RBL_SYNY3	Ribulose bisphosphate carboxylase large chain OS=Synechocystis sp. (strain PCC 6803 / Kazusa) OX=1111708 GN=cbbL PE=1 SV=1	10	4	322	52490.7	10	3	883	2.74224
P73319	RL4_SYNY3	Large ribosomal subunit protein uL4 OS=Synechocystis sp. (strain PCC 6803 / Kazusa) OX=1111708 GN=rplD PE=3 SV=1	58.1	22	127000	23355.8	24.29	4	633	0.00498425
P74069	NDHN_SYNY3	NAD(P)H-quinone oxidoreductase subunit N OS=Synechocystis sp. (strain PCC 6803 / Kazusa) OX=1111708 GN=ndhN PE=1 SV=1	36.02	6	3080	17629.5	16.15	3	593	0.192532
Q55460	CMPA_SYNY3	Bicarbonate-binding protein CmpA OS=Synechocystis sp. (strain PCC 6803 / Kazusa) OX=1111708 GN=cmpA PE=1 SV=1					12.17	3	570	#DIV/0!
Q55332	PSBU_SYNY3	Photosystem II extrinsic protein U OS=Synechocystis sp. (strain PCC 6803 / Kazusa) OX=1111708 GN=psbU PE=1 SV=2	41.98	3	2080	14245.2	41.98	3	507	0.24375
Q55610	SECD_SYNY3	Protein translocase subunit SecD OS=Synechocystis sp. (strain PCC 6803 / Kazusa) OX=1111708 GN=secD PE=3 SV=1	51.48	37	87100	50468.5	5.72	2	465	0.00533869
P74229	RS7_SYNY3	Small ribosomal subunit protein uS7 OS=Synechocystis sp. (strain PCC 6803 / Kazusa) OX=1111708 GN=rpsG PE=3 SV=1	83.33	14	71300	17384.1	13.46	2	409	0.00573633
P72752	Y2009_SYNY3	Thylakoid membrane protein ssl2009 OS=Synechocystis sp. (strain PCC 6803 / Kazusa) OX=1111708 GN=ssl2009 PE=4 SV=1	28.28	3	11300	10805	23.23	2	357	0.0315929
P73728	PRX5_SYNY3	Peroxiredoxin sll1621 OS=Synechocystis sp. (strain PCC 6803 / Kazusa) OX=1111708 GN=sll1621 PE=1 SV=1	99.47	29	63900	21167.2	31.75	4	349	0.00546166
P73179	FTSH1_SYNY3	ATP-dependent zinc metalloprotease FtsH 1 OS=Synechocystis sp. (strain PCC 6803 / Kazusa) OX=1111708 GN=ftsH1 PE=2 SV=1	43.91	28	22200	72109.9	12.18	2	342	0.0154054
P27724	NDHH_SYNY3	NAD(P)H-quinone oxidoreductase subunit H OS=Synechocystis sp. (strain PCC 6803 / Kazusa) OX=1111708 GN=ndhH PE=1 SV=3	8.88	3	589	45534.5	6.09	2	316	0.536503
P77969	HEM2_SYNY3	Delta-aminolevulinic acid dehydratase OS=Synechocystis sp. (strain PCC 6803 / Kazusa) OX=1111708 GN=hemB PE=3 SV=1	54.13	20	19700	36163.3	16.21	4	273	0.0138579
Q55200	SPHX_SYNY3	Protein SphX OS=Synechocystis sp. (strain PCC 6803 / Kazusa) OX=1111708 GN=sphX PE=3 SV=1	34.52	14	11600	36778.6	8.93	2	77.2	0.00665517
Q55843	PURQ_SYNY3	Phosphoribosylformylglycinamidine synthase subunit PurQ OS=Synechocystis sp. (strain PCC 6803 / Kazusa) OX=1111708 GN=purQ PE=1 SV=1	16.52	2	76.2	24428.8				0
P73301	IF1_SYNY3	Translation initiation factor IF-1 OS=Synechocystis sp. (strain PCC 6803 / Kazusa) OX=1111708 GN=infA PE=3 SV=2	45.33	3	301	8681.19				0
P73067	DXS_SYNY3	1-deoxy-D-xylulose-5-phosphate synthase OS=Synechocystis sp. (strain PCC 6803 / Kazusa) OX=1111708 GN=dxs PE=3 SV=1	4.38	2	465	69327.8				0
P73056	YC64L_SYNY3	Uncharacterized monothiol glutaredoxin ycf64-like OS=Synechocystis sp. (strain PCC 6803 / Kazusa) OX=1111708 GN=slr1846 PE=3 SV=1	19.63	2	1570	11939.8				0
P52231	THIO_SYNY3	Thioredoxin OS=Synechocystis sp. (strain PCC 6803 / Kazusa) OX=1111708 GN=trxA PE=1 SV=3	99.07	14	14600	11748.5				0
P72703	SPEB1_SYNY3	Agmatinase 1 OS=Synechocystis sp. (strain PCC 6803 / Kazusa) OX=1111708 GN=speB1 PE=3 SV=1	78.76	30	57100	33463.1				0
P73202	PYS1_SYNY3	Phycobilisome 8.9 kDa linker polypeptide, phycocyanin-associated, rod OS=Synechocystis sp. (strain PCC 6803 / Kazusa) OX=1111708 GN=cpcD PE=1 SV=1	100	6	12300	9322.35				0
Q55518	Y528_SYNY3	Putative zinc metalloprotease sll0528 OS=Synechocystis sp. (strain PCC 6803 / Kazusa) OX=1111708 GN=sll0528 PE=3 SV=1	11.61	3	819	40465.4				0
Q55759	GCH1_SYNY3	GTP cyclohydrolase 1 OS=Synechocystis sp. (strain PCC 6803 / Kazusa) OX=1111708 GN=folE PE=3 SV=1	20.51	2		26639.6				#DIV/0!
P48944	RS14_SYNY3	Small ribosomal subunit protein uS14 OS=Synechocystis sp. (strain PCC 6803 / Kazusa) OX=1111708 GN=rpsN PE=3 SV=1	39	6	28700	11853.6				0
P37101	KPPR_SYNY3	Phosphoribulokinase OS=Synechocystis sp. (strain PCC 6803 / Kazusa) OX=1111708 GN=prk PE=2 SV=1	82.83	27	24300	37913.4				0
P73560	GCSH_SYNY3	Glycine cleavage system H protein OS=Synechocystis sp. (strain PCC 6803 / Kazusa) OX=1111708 GN=gcvH PE=3 SV=1	74.24	12	10700	14579.9				0
P73655	SYW_SYNY3	Tryptophan--tRNA ligase OS=Synechocystis sp. (strain PCC 6803 / Kazusa) OX=1111708 GN=trpS PE=3 SV=2	26.71	9	4890	37763.5				0
P73304	RS5_SYNY3	Small ribosomal subunit protein uS5 OS=Synechocystis sp. (strain PCC 6803 / Kazusa) OX=1111708 GN=rpsE PE=3 SV=1	35.26	13	85300	18241.1				0
P72689	IF2_SYNY3	Translation initiation factor IF-2 OS=Synechocystis sp. (strain PCC 6803 / Kazusa) OX=1111708 GN=infB PE=3 SV=1	3.9	3	146	108119				0
P23349	RL7_SYNY3	Large ribosomal subunit protein bL12 OS=Synechocystis sp. (strain PCC 6803 / Kazusa) OX=1111708 GN=rplL PE=1 SV=3	99.22	45	379000	13259.3				0
P74429	YCF39_SYNY3	Photosystem II assembly factor Ycf39 OS=Synechocystis sp. (strain PCC 6803 / Kazusa) OX=1111708 GN=ycf39 PE=1 SV=1	27.3	6	2400	36519.2				0
P80505	G3P2_SYNY3	Glyceraldehyde-3-phosphate dehydrogenase 2 OS=Synechocystis sp. (strain PCC 6803 / Kazusa) OX=1111708 GN=gap2 PE=1 SV=3	76.85	30	81000	36512.5				0
P74410	RS16_SYNY3	Small ribosomal subunit protein bS16 OS=Synechocystis sp. (strain PCC 6803 / Kazusa) OX=1111708 GN=rpsP PE=3 SV=1	84.15	7	36200	9556.16				0
Q55707	VIPP1_SYNY3	Membrane-associated protein Vipp1 OS=Synechocystis sp. (strain PCC 6803 / Kazusa) OX=1111708 GN=vipp1 PE=1 SV=1	53.18	10	2860	28905.3				0
P74226	RS10_SYNY3	Small ribosomal subunit protein uS10 OS=Synechocystis sp. (strain PCC 6803 / Kazusa) OX=1111708 GN=rpsJ PE=3 SV=1	74.29	16	102000	12037				0
Q55792	Y076_SYNY3	Iron-sulfur cluster assembly SufBD family protein slr0076 OS=Synechocystis sp. (strain PCC 6803 / Kazusa) OX=1111708 GN=slr0076 PE=3 SV=1	16.34	5	1630	50001.5				0
P77973	ASSY_SYNY3	Argininosuccinate synthase OS=Synechocystis sp. (strain PCC 6803 / Kazusa) OX=1111708 GN=argG PE=1 SV=1	9.75	2	495	44484.8				0
P36237	RL11_SYNY3	Large ribosomal subunit protein uL11 OS=Synechocystis sp. (strain PCC 6803 / Kazusa) OX=1111708 GN=rplK PE=3 SV=1	53.9	7	15300	14977.5				0
P73639	Y1766_SYNY3	Uncharacterized protein sll1766 OS=Synechocystis sp. (strain PCC 6803 / Kazusa) OX=1111708 GN=sll1766 PE=3 SV=1	8.29	2		45702.4				#DIV/0!
Q55612	LPXD_SYNY3	UDP-3-O-acylglucosamine N-acyltransferase OS=Synechocystis sp. (strain PCC 6803 / Kazusa) OX=1111708 GN=lpxD PE=3 SV=1	5.23	2	496	36193.5				0
Q55736	NHAS5_SYNY3	Na(+)/H(+) antiporter NhaS5 OS=Synechocystis sp. (strain PCC 6803 / Kazusa) OX=1111708 GN=nhaS5 PE=3 SV=1	4.58	2	262	75547.8				0
P73796	URE3_SYNY3	Urease subunit gamma OS=Synechocystis sp. (strain PCC 6803 / Kazusa) OX=1111708 GN=ureA PE=3 SV=1	32	2	895	11055.8				0
Q55013	CY550_SYNY3	Photosystem II extrinsic protein V OS=Synechocystis sp. (strain PCC 6803 / Kazusa) OX=1111708 GN=psbV PE=1 SV=2	13.75	2	1550	17884.1				0
P73407	CCMK4_SYNY3	Carboxysome shell protein CcmK4 OS=Synechocystis sp. (strain PCC 6803 / Kazusa) OX=1111708 GN=ccmK4 PE=1 SV=3	55.36	6	3230	11902.7				0
Q55469	MURE_SYNY3	UDP-N-acetylmuramoyl-L-alanyl-D-glutamate--2,6-diaminopimelate ligase OS=Synechocystis sp. (strain PCC 6803 / Kazusa) OX=1111708 GN=murE PE=3 SV=1	6.14	3	1070	54601.1				0
Q55894	THIC_SYNY3	Phosphomethylpyrimidine synthase OS=Synechocystis sp. (strain PCC 6803 / Kazusa) OX=1111708 GN=thiC PE=3 SV=1	8.93	3	461	51137.3				0
P72817	Y1654_SYNY3	Universal stress protein Sll1654 OS=Synechocystis sp. (strain PCC 6803 / Kazusa) OX=1111708 GN=sll1654 PE=3 SV=1	22.93	2	300	16769.4				0
P80046	IDH_SYNY3	Isocitrate dehydrogenase [NADP] OS=Synechocystis sp. (strain PCC 6803 / Kazusa) OX=1111708 GN=icd PE=1 SV=2	4.42	2	71.9	52274.8				0
P73832	CPHB_SYNY3	Cyanophycinase OS=Synechocystis sp. (strain PCC 6803 / Kazusa) OX=1111708 GN=cphB PE=1 SV=1	6.64	2		29389.6				#DIV/0!
P77965	RPOB_SYNY3	DNA-directed RNA polymerase subunit beta OS=Synechocystis sp. (strain PCC 6803 / Kazusa) OX=1111708 GN=rpoB PE=1 SV=1	5.54	6	886	123365				0
P74466	CLPR_SYNY3	Putative ATP-dependent Clp protease proteolytic subunit-like OS=Synechocystis sp. (strain PCC 6803 / Kazusa) OX=1111708 GN=clpR PE=3 SV=1	34.67	7	4800	24881.6				0
P74467	CLPP3_SYNY3	Probable ATP-dependent Clp protease proteolytic subunit 3 OS=Synechocystis sp. (strain PCC 6803 / Kazusa) OX=1111708 GN=clpP3 PE=3 SV=1	32.67	5	4090	22396.8				0
P73299	RS13_SYNY3	Small ribosomal subunit protein uS13 OS=Synechocystis sp. (strain PCC 6803 / Kazusa) OX=1111708 GN=rpsM PE=3 SV=1	55.12	12	24400	14571.7				0
Q59987	POR_SYNY3	Light-dependent protochlorophyllide reductase OS=Synechocystis sp. (strain PCC 6803 / Kazusa) OX=1111708 GN=por PE=1 SV=2	57.14	20	11200	36061.6				0
P73305	RL18_SYNY3	Large ribosomal subunit protein uL18 OS=Synechocystis sp. (strain PCC 6803 / Kazusa) OX=1111708 GN=rplR PE=3 SV=1	73.33	6	50600	13204				0
P73289	RL25_SYNY3	Large ribosomal subunit protein bL25 OS=Synechocystis sp. (strain PCC 6803 / Kazusa) OX=1111708 GN=rplY PE=3 SV=2	98.98	10	52700	11140.9				0
P26533	ATPE_SYNY3	ATP synthase epsilon chain OS=Synechocystis sp. (strain PCC 6803 / Kazusa) OX=1111708 GN=atpC PE=1 SV=3	25	4	1490	14580.5				0
P73790	PHS_SYNY3	Putative pterin-4-alpha-carbinolamine dehydratase OS=Synechocystis sp. (strain PCC 6803 / Kazusa) OX=1111708 GN=ssl2296 PE=3 SV=1	95.83	9	6080	10734				0
P73061	URE1_SYNY3	Urease subunit alpha OS=Synechocystis sp. (strain PCC 6803 / Kazusa) OX=1111708 GN=ureC PE=3 SV=1	14.24	5	1940	61037.6				0
P48959	RL35_SYNY3	Large ribosomal subunit protein bL35 OS=Synechocystis sp. (strain PCC 6803 / Kazusa) OX=1111708 GN=rpmI PE=3 SV=1	26.87	2	4760	7891.4				0
P74068	Y1263_SYNY3	Uncharacterized transporter sll1263 OS=Synechocystis sp. (strain PCC 6803 / Kazusa) OX=1111708 GN=sll1263 PE=3 SV=1	6.13	2	386	33324.2				0
P52981	GLGB_SYNY3	1,4-alpha-glucan branching enzyme GlgB OS=Synechocystis sp. (strain PCC 6803 / Kazusa) OX=1111708 GN=glgB PE=3 SV=1	21.69	18	5420	89527.5				0
P28371	EFG1_SYNY3	Elongation factor G 1 OS=Synechocystis sp. (strain PCC 6803 / Kazusa) OX=1111708 GN=fusA PE=1 SV=2	37.55	17	9020	76750.1				0
Q55848	KPRS_SYNY3	Ribose-phosphate pyrophosphokinase OS=Synechocystis sp. (strain PCC 6803 / Kazusa) OX=1111708 GN=prs PE=3 SV=1	55.86	16	8650	36395.8				0
P73720	OPCA_SYNY3	Putative OxPP cycle protein OpcA OS=Synechocystis sp. (strain PCC 6803 / Kazusa) OX=1111708 GN=opcA PE=4 SV=1	8	2	162	52034				0
P73411	G6PD_SYNY3	Glucose-6-phosphate 1-dehydrogenase OS=Synechocystis sp. (strain PCC 6803 / Kazusa) OX=1111708 GN=zwf PE=3 SV=1	9.04	3	403	57886.1				0
Q55385	RRP3_SYNY3	Probable small ribosomal subunit protein cS23 OS=Synechocystis sp. (strain PCC 6803 / Kazusa) OX=1111708 GN=slr0923 PE=1 SV=1	99.11	14	11500	12638.3				0
P48957	RL20_SYNY3	Large ribosomal subunit protein bL20 OS=Synechocystis sp. (strain PCC 6803 / Kazusa) OX=1111708 GN=rplT PE=3 SV=1	46.15	9	15700	13553.1				0
Q55690	SYGB_SYNY3	Glycine--tRNA ligase beta subunit OS=Synechocystis sp. (strain PCC 6803 / Kazusa) OX=1111708 GN=glyS PE=3 SV=1	4.43	4	478	80051.1				0
P72623	GLGA2_SYNY3	Probable glycogen synthase 2 OS=Synechocystis sp. (strain PCC 6803 / Kazusa) OX=1111708 GN=glgA2 PE=3 SV=1	12.83	5	1320	56224.8				0
P72759	CCML_SYNY3	Carboxysome shell vertex protein CcmL OS=Synechocystis sp. (strain PCC 6803 / Kazusa) OX=1111708 GN=ccmL PE=1 SV=1	64	3	1310	10638.2				0
P74071	RS2_SYNY3	Small ribosomal subunit protein uS2 OS=Synechocystis sp. (strain PCC 6803 / Kazusa) OX=1111708 GN=rpsB PE=3 SV=1	52.04	20	20400	30150.1				0
P73314	RS3_SYNY3	Small ribosomal subunit protein uS3 OS=Synechocystis sp. (strain PCC 6803 / Kazusa) OX=1111708 GN=rpsC PE=1 SV=3	65	27	50600	27147.1				0
P74572	P5CR_SYNY3	Pyrroline-5-carboxylate reductase OS=Synechocystis sp. (strain PCC 6803 / Kazusa) OX=1111708 GN=proC PE=3 SV=1	14.98	3	32.8	27883.5				0
P74230	RS12_SYNY3	Small ribosomal subunit protein uS12 OS=Synechocystis sp. (strain PCC 6803 / Kazusa) OX=1111708 GN=rpsL PE=3 SV=1	34.13	7	43700	14176.6				0
P73306	RL6_SYNY3	Large ribosomal subunit protein uL6 OS=Synechocystis sp. (strain PCC 6803 / Kazusa) OX=1111708 GN=rplF PE=3 SV=1	70.39	20	64000	19666.7				0
P73311	RS17_SYNY3	Small ribosomal subunit protein uS17 OS=Synechocystis sp. (strain PCC 6803 / Kazusa) OX=1111708 GN=rpsQ PE=3 SV=1	55.56	9	22800	9288.82				0
P72753	UPP_SYNY3	Uracil phosphoribosyltransferase OS=Synechocystis sp. (strain PCC 6803 / Kazusa) OX=1111708 GN=upp PE=3 SV=1	22.22	3	573	23637.7				0
P73016	FABI_SYNY3	Enoyl-[acyl-carrier-protein] reductase [NADH] FabI OS=Synechocystis sp. (strain PCC 6803 / Kazusa) OX=1111708 GN=fabI PE=3 SV=2	9.3	2		27625.7				#DIV/0!
P73296	RL17_SYNY3	Large ribosomal subunit protein bL17 OS=Synechocystis sp. (strain PCC 6803 / Kazusa) OX=1111708 GN=rplQ PE=3 SV=1	69.83	13	70300	13228.4				0
Q59993	CLPP2_SYNY3	ATP-dependent Clp protease proteolytic subunit 2 OS=Synechocystis sp. (strain PCC 6803 / Kazusa) OX=1111708 GN=clpP2 PE=3 SV=1	34.07	6	4770	24823.4				0
P73300	RL36_SYNY3	Large ribosomal subunit protein bL36 OS=Synechocystis sp. (strain PCC 6803 / Kazusa) OX=1111708 GN=rpmJ PE=3 SV=1	31.58	3	11000	4455.47				0
P20804	ACP_SYNY3	Acyl carrier protein OS=Synechocystis sp. (strain PCC 6803 / Kazusa) OX=1111708 GN=acpP PE=1 SV=2	53.25	5	16400	8589.58				0
P74060	Y821_SYNY3	Putative sulfur carrier protein slr0821 OS=Synechocystis sp. (strain PCC 6803 / Kazusa) OX=1111708 GN=slr0821 PE=3 SV=1	31.19	5	10300	11694.4				0
P72955	UREG_SYNY3	Urease accessory protein UreG OS=Synechocystis sp. (strain PCC 6803 / Kazusa) OX=1111708 GN=ureG PE=3 SV=1	23.3	4		22012.5				#DIV/0!
P74457	PYRH_SYNY3	Uridylate kinase OS=Synechocystis sp. (strain PCC 6803 / Kazusa) OX=1111708 GN=pyrH PE=3 SV=1	15.77	3	8000	27651				0
P73534	KPYK2_SYNY3	Pyruvate kinase 2 OS=Synechocystis sp. (strain PCC 6803 / Kazusa) OX=1111708 GN=pyk2 PE=3 SV=1	4.74	2	219	62985.6				0
P48946	RS18_SYNY3	Small ribosomal subunit protein bS18 OS=Synechocystis sp. (strain PCC 6803 / Kazusa) OX=1111708 GN=rpsR PE=3 SV=1	100	15	68600	8380.92				0
P73418	DBH_SYNY3	DNA-binding protein HU OS=Synechocystis sp. (strain PCC 6803 / Kazusa) OX=1111708 GN=hup PE=3 SV=2	17	3	6760	10890.6				0
Q55233	DRGA_SYNY3	Protein DrgA OS=Synechocystis sp. (strain PCC 6803 / Kazusa) OX=1111708 GN=drgA PE=1 SV=1	7.62	2		23703.4				#DIV/0!
Q55611	SECF_SYNY3	Protein translocase subunit SecF OS=Synechocystis sp. (strain PCC 6803 / Kazusa) OX=1111708 GN=secF PE=3 SV=1	10.48	3	3270	34667.3				0
P42352	RL9_SYNY3	Large ribosomal subunit protein bL9 OS=Synechocystis sp. (strain PCC 6803 / Kazusa) OX=1111708 GN=rplI PE=3 SV=2	99.34	33	91400	16641.3				0
P74360	Y1526_SYNY3	Uncharacterized protein sll1526 OS=Synechocystis sp. (strain PCC 6803 / Kazusa) OX=1111708 GN=sll1526 PE=4 SV=1	7.31	2	142	57727				0
Q55682	Y021_SYNY3	Putative protease slr0021 OS=Synechocystis sp. (strain PCC 6803 / Kazusa) OX=1111708 GN=slr0021 PE=3 SV=1	69.68	21	27800	30273.9				0
P36239	RL19_SYNY3	Large ribosomal subunit protein bL19 OS=Synechocystis sp. (strain PCC 6803 / Kazusa) OX=1111708 GN=rplS PE=3 SV=1	43.44	16	39000	13786.2				0
P73298	RS11_SYNY3	Small ribosomal subunit protein uS11 OS=Synechocystis sp. (strain PCC 6803 / Kazusa) OX=1111708 GN=rpsK PE=3 SV=1	33.08	9	44100	13761.8				0
Q55141	ILVH_SYNY3	Acetolactate synthase small subunit OS=Synechocystis sp. (strain PCC 6803 / Kazusa) OX=1111708 GN=ilvH PE=3 SV=2	11.05	2	708	18870.9				0
P19050	NDHK1_SYNY3	NAD(P)H-quinone oxidoreductase subunit K 1 OS=Synechocystis sp. (strain PCC 6803 / Kazusa) OX=1111708 GN=ndhK1 PE=1 SV=1	31.85	5	3860	27345.6				0
P54899	ARGC_SYNY3	N-acetyl-gamma-glutamyl-phosphate reductase OS=Synechocystis sp. (strain PCC 6803 / Kazusa) OX=1111708 GN=argC PE=3 SV=1	23.65	6	767	38209				0
P74008	SAHH_SYNY3	Adenosylhomocysteinase OS=Synechocystis sp. (strain PCC 6803 / Kazusa) OX=1111708 GN=ahcY PE=1 SV=1	33.41	9	3320	46213.9				0
P73145	SSB2_SYNY3	Thylakoid-associated single-stranded DNA-binding protein slr1034 OS=Synechocystis sp. (strain PCC 6803 / Kazusa) OX=1111708 GN=slr1034 PE=1 SV=1	80.62	14	29700	14408.3				0
P74250	GPX1_SYNY3	Hydroperoxy fatty acid reductase gpx1 OS=Synechocystis sp. (strain PCC 6803 / Kazusa) OX=1111708 GN=gpx1 PE=1 SV=1	37.28	3	283	18452				0
P74689	ILVD_SYNY3	Dihydroxy-acid dehydratase OS=Synechocystis sp. (strain PCC 6803 / Kazusa) OX=1111708 GN=ilvD PE=1 SV=1	10.34	3	888	58646.2				0
P74592	HISZ_SYNY3	ATP phosphoribosyltransferase regulatory subunit OS=Synechocystis sp. (strain PCC 6803 / Kazusa) OX=1111708 GN=hisZ PE=3 SV=1	8.98	3	280	44282.4				0
P48949	RS21_SYNY3	Small ribosomal subunit protein bS21 OS=Synechocystis sp. (strain PCC 6803 / Kazusa) OX=1111708 GN=rpsU PE=3 SV=1	51.67	7	29800	7341.44				0
P73317	RL2_SYNY3	Large ribosomal subunit protein uL2 OS=Synechocystis sp. (strain PCC 6803 / Kazusa) OX=1111708 GN=rplB PE=3 SV=1	57.61	33	76000	30433.1				0
P74177	RPOC1_SYNY3	DNA-directed RNA polymerase subunit gamma OS=Synechocystis sp. (strain PCC 6803 / Kazusa) OX=1111708 GN=rpoC1 PE=1 SV=1	30.67	14	2050	70978.1				0
P73911	KATG_SYNY3	Catalase-peroxidase OS=Synechocystis sp. (strain PCC 6803 / Kazusa) OX=1111708 GN=katG PE=1 SV=1	6.37	4	579	84445.9				0
Q55503	HIS1_SYNY3	ATP phosphoribosyltransferase OS=Synechocystis sp. (strain PCC 6803 / Kazusa) OX=1111708 GN=hisG PE=3 SV=1	34.76	6	3420	23436.2				0
P74521	GLGA1_SYNY3	Glycogen synthase 1 OS=Synechocystis sp. (strain PCC 6803 / Kazusa) OX=1111708 GN=glgA1 PE=3 SV=1	27.46	10	1590	54346.3				0
P77972	ENO_SYNY3	Enolase OS=Synechocystis sp. (strain PCC 6803 / Kazusa) OX=1111708 GN=eno PE=3 SV=1	16.2	6	2740	46528.6				0
Q02907	APCE_SYNY4	Phycobiliprotein ApcE OS=Synechocystis sp. (strain PCC 6714) OX=1147 GN=apcE PE=3 SV=1	51	45	39500	100461				0
P22034	CH602_SYNY3	Chaperonin GroEL 2 OS=Synechocystis sp. (strain PCC 6803 / Kazusa) OX=1111708 GN=groEL2 PE=1 SV=4	4.89	2	1180	57774.3				0
P73848	FABZ_SYNY3	3-hydroxyacyl-[acyl-carrier-protein] dehydratase FabZ OS=Synechocystis sp. (strain PCC 6803 / Kazusa) OX=1111708 GN=fabZ PE=3 SV=2	27.44	3	450	17941.9				0
P74518	HPF_SYNY3	Ribosome hibernation promotion factor OS=Synechocystis sp. (strain PCC 6803 / Kazusa) OX=1111708 GN=hpf PE=3 SV=1	90.05	26	39700	21894.9				0
P22358	DNAK2_SYNY3	Chaperone protein DnaK2 OS=Synechocystis sp. (strain PCC 6803 / Kazusa) OX=1111708 GN=dnaK2 PE=2 SV=1	18.87	7	7140	67614.2				0
P17253	ATPG_SYNY3	ATP synthase gamma chain OS=Synechocystis sp. (strain PCC 6803 / Kazusa) OX=1111708 GN=atpG PE=3 SV=1	17.2	6	1320	34605.7				0
P73922	FBSB_SYNY3	D-fructose 1,6-bisphosphatase class 2/sedoheptulose 1,7-bisphosphatase OS=Synechocystis sp. (strain PCC 6803 / Kazusa) OX=1111708 GN=slr2094 PE=1 SV=1	66.96	22	20800	37074.5				0
P74709	SURE_SYNY3	5'-nucleotidase SurE OS=Synechocystis sp. (strain PCC 6803 / Kazusa) OX=1111708 GN=surE PE=3 SV=1	26.91	4	737	30464.5				0
P73297	RPOA_SYNY3	DNA-directed RNA polymerase subunit alpha OS=Synechocystis sp. (strain PCC 6803 / Kazusa) OX=1111708 GN=rpoA PE=1 SV=1	21.66	8	9810	35003.8				0
P73093	PYG_SYNY3	Phycobilisome rod-core linker polypeptide CpcG OS=Synechocystis sp. (strain PCC 6803 / Kazusa) OX=1111708 GN=cpcG PE=1 SV=2	40.16	11	557	28901.8				0
P73824	GPX2_SYNY3	Hydroperoxy fatty acid reductase Gpx2 OS=Synechocystis sp. (strain PCC 6803 / Kazusa) OX=1111708 GN=gpx2 PE=1 SV=1	78.57	7	10300	16646				0
P54416	CLPP1_SYNY3	ATP-dependent Clp protease proteolytic subunit 1 OS=Synechocystis sp. (strain PCC 6803 / Kazusa) OX=1111708 GN=clpP1 PE=3 SV=1	73.74	12	21600	21740.8				0
Q55709	SECA_SYNY3	Protein translocase subunit SecA OS=Synechocystis sp. (strain PCC 6803 / Kazusa) OX=1111708 GN=secA PE=3 SV=1	28.22	22	5590	107009				0
P73334	RPOC2_SYNY3	DNA-directed RNA polymerase subunit beta' OS=Synechocystis sp. (strain PCC 6803 / Kazusa) OX=1111708 GN=rpoC2 PE=1 SV=1	11.77	11	1960	144777				0
P48939	RS4_SYNY3	Small ribosomal subunit protein uS4 OS=Synechocystis sp. (strain PCC 6803 / Kazusa) OX=1111708 GN=rpsD PE=3 SV=1	33.17	9	2450	23182.8				0
Q55663	DXR_SYNY3	1-deoxy-D-xylulose 5-phosphate reductoisomerase OS=Synechocystis sp. (strain PCC 6803 / Kazusa) OX=1111708 GN=dxr PE=3 SV=1	24.87	7	1220	42532				0
P72740	DLDH_SYNY3	Dihydrolipoyl dehydrogenase OS=Synechocystis sp. (strain PCC 6803 / Kazusa) OX=1111708 GN=lpdA PE=1 SV=3	63.5	35	17400	50832.2				0
P72659	PNP_SYNY3	Polyribonucleotide nucleotidyltransferase OS=Synechocystis sp. (strain PCC 6803 / Kazusa) OX=1111708 GN=pnp PE=1 SV=1	49.03	31	45200	77831.4				0
Q55716	SYGA_SYNY3	Glycine--tRNA ligase alpha subunit OS=Synechocystis sp. (strain PCC 6803 / Kazusa) OX=1111708 GN=glyQ PE=3 SV=1	15.72	3	2210	34363				0
P73632	DDL_SYNY3	D-alanine--D-alanine ligase OS=Synechocystis sp. (strain PCC 6803 / Kazusa) OX=1111708 GN=ddl PE=3 SV=1	42.09	12	6320	38774.1				0
P73309	RL24_SYNY3	Large ribosomal subunit protein uL24 OS=Synechocystis sp. (strain PCC 6803 / Kazusa) OX=1111708 GN=rplX PE=3 SV=1	81.74	13	68800	12823				0
P73312	RL29_SYNY3	Large ribosomal subunit protein uL29 OS=Synechocystis sp. (strain PCC 6803 / Kazusa) OX=1111708 GN=rpmC PE=3 SV=1	84.93	11	116000	8545.64				0
P73450	NRTC_SYNY3	Nitrate import ATP-binding protein NrtC OS=Synechocystis sp. (strain PCC 6803 / Kazusa) OX=1111708 GN=nrtC PE=3 SV=1	32.09	19	8700	75100.6				0
P73294	RL13_SYNY3	Large ribosomal subunit protein uL13 OS=Synechocystis sp. (strain PCC 6803 / Kazusa) OX=1111708 GN=rplM PE=3 SV=1	89.4	23	61800	16990.7				0
Q05971	CH10_SYNY3	Co-chaperonin GroES OS=Synechocystis sp. (strain PCC 6803 / Kazusa) OX=1111708 GN=groES PE=1 SV=3	44.66	5	5250	10859.4				0
Q55593	KTHY_SYNY3	Thymidylate kinase OS=Synechocystis sp. (strain PCC 6803 / Kazusa) OX=1111708 GN=tmk PE=3 SV=2	17.45	2	115	24349.5				0
P73920	TXLA_SYNY3	Thiol:disulfide interchange protein TxlA homolog OS=Synechocystis sp. (strain PCC 6803 / Kazusa) OX=1111708 GN=txlA PE=3 SV=1	37.78	3	234	19517.1				0
P74421	PGK_SYNY3	Phosphoglycerate kinase OS=Synechocystis sp. (strain PCC 6803 / Kazusa) OX=1111708 GN=pgk PE=3 SV=2	56.86	26	30400	41783.9				0
P72871	METK_SYNY3	S-adenosylmethionine synthase OS=Synechocystis sp. (strain PCC 6803 / Kazusa) OX=1111708 GN=metK PE=3 SV=2	11.27	4	1280	45865.8				0
P74338	NDHM_SYNY3	NAD(P)H-quinone oxidoreductase subunit M OS=Synechocystis sp. (strain PCC 6803 / Kazusa) OX=1111708 GN=ndhM PE=1 SV=1	27.27	2	267	14077.7				0
P72940	CYSC_SYNY3	Probable adenylyl-sulfate kinase OS=Synechocystis sp. (strain PCC 6803 / Kazusa) OX=1111708 GN=cysC PE=1 SV=1	29.38	4	612	19674.4				0
P74433	FLPA_SYNY3	Protein FLAP1 homolog A OS=Synechocystis sp. (strain PCC 6803 / Kazusa) OX=1111708 GN=flpA PE=3 SV=1	28.83	5	4920	34864.5				0
P74352	RPOZ_SYNY3	DNA-directed RNA polymerase subunit omega OS=Synechocystis sp. (strain PCC 6803 / Kazusa) OX=1111708 GN=rpoZ PE=1 SV=1	35.53	4	542	8736.76				0
Q02925	PYC1_SYNY4	Phycobilisome 7.8 kDa linker polypeptide, allophycocyanin-associated, core OS=Synechocystis sp. (strain PCC 6714) OX=1147 GN=apcC PE=3 SV=1	61.19	3	7230	7805.16				0
P00243	FER_SYNY4	Ferredoxin OS=Synechocystis sp. (strain PCC 6714) OX=1147 PE=1 SV=2	23.71	3	198	10390.3				0
P74102	OCP_SYNY3	Orange carotenoid-binding protein OS=Synechocystis sp. (strain PCC 6803 / Kazusa) OX=1111708 GN=slr1963 PE=1 SV=1	32.18	11	4620	34658.8				0
P77961	GLN1B_SYNY3	Glutamine synthetase OS=Synechocystis sp. (strain PCC 6803 / Kazusa) OX=1111708 GN=glnA PE=1 SV=2	37.84	17	8300	53025.9				0
Q55574	PYRE_SYNY3	Orotate phosphoribosyltransferase OS=Synechocystis sp. (strain PCC 6803 / Kazusa) OX=1111708 GN=pyrE PE=3 SV=1	37.37	5	691	21372.6				0
P73292	RL31_SYNY3	Large ribosomal subunit protein bL31 OS=Synechocystis sp. (strain PCC 6803 / Kazusa) OX=1111708 GN=rpmE PE=3 SV=1	74.07	8	62300	9303.67				0
P73313	RL16_SYNY3	Large ribosomal subunit protein uL16 OS=Synechocystis sp. (strain PCC 6803 / Kazusa) OX=1111708 GN=rplP PE=3 SV=1	65.47	11	67000	16034.7				0
P74771	NDHO_SYNY3	NAD(P)H-quinone oxidoreductase subunit O OS=Synechocystis sp. (strain PCC 6803 / Kazusa) OX=1111708 GN=ndhO PE=1 SV=1	33.33	4	4600	8288.57				0
P74208	PYRG_SYNY3	CTP synthase OS=Synechocystis sp. (strain PCC 6803 / Kazusa) OX=1111708 GN=pyrG PE=3 SV=1	10.33	3	232	61515.2				0
P73530	RS1A_SYNY3	Small ribosomal subunit protein bS1A OS=Synechocystis sp. (strain PCC 6803 / Kazusa) OX=1111708 GN=rps1A PE=3 SV=1	85.98	53	79500	36570.1				0
Q55467	CHLM_SYNY3	Magnesium-protoporphyrin O-methyltransferase OS=Synechocystis sp. (strain PCC 6803 / Kazusa) OX=1111708 GN=chlM PE=1 SV=1	10.43	2	612	25080.7				0
P74228	EFG2_SYNY3	Elongation factor G 2 OS=Synechocystis sp. (strain PCC 6803 / Kazusa) OX=1111708 GN=fusB PE=3 SV=1	6.08	3	320	75431.2				0
P72966	BTPA_SYNY3	Photosystem I biogenesis protein BtpA OS=Synechocystis sp. (strain PCC 6803 / Kazusa) OX=1111708 GN=btpA PE=3 SV=1	13.59	2		30042.4				#DIV/0!
P73302	KAD1_SYNY3	Adenylate kinase 1 OS=Synechocystis sp. (strain PCC 6803 / Kazusa) OX=1111708 GN=adk1 PE=1 SV=3	17.11	2	47.2	20453.5				0
Q55665	GSA_SYNY3	Glutamate-1-semialdehyde 2,1-aminomutase OS=Synechocystis sp. (strain PCC 6803 / Kazusa) OX=1111708 GN=hemL PE=3 SV=2	29.56	6	859	45891.6				0
P74070	EFTS_SYNY3	Elongation factor Ts OS=Synechocystis sp. (strain PCC 6803 / Kazusa) OX=1111708 GN=tsf PE=1 SV=3	36.24	8	5320	24230.8				0
P73617	TRPD_SYNY3	Anthranilate phosphoribosyltransferase OS=Synechocystis sp. (strain PCC 6803 / Kazusa) OX=1111708 GN=trpD PE=3 SV=1	10.34	2	484	36005.1				0
P72622	MSRA1_SYNY3	Peptide methionine sulfoxide reductase MsrA 1 OS=Synechocystis sp. (strain PCC 6803 / Kazusa) OX=1111708 GN=msrA1 PE=3 SV=1	17.57	2	1250	24209.1				0
P73722	LEXA_SYNY3	Transcription regulator LexA OS=Synechocystis sp. (strain PCC 6803 / Kazusa) OX=1111708 GN=lexA PE=1 SV=1	54.68	9	4230	22744.2				0
P73263	THIO2_SYNY3	Thioredoxin-like protein slr1139 OS=Synechocystis sp. (strain PCC 6803 / Kazusa) OX=1111708 GN=slr1139 PE=1 SV=1	58.72	3	309	12171.3				0
P74551	APCF_SYNY3	Allophycocyanin subunit beta-18 OS=Synechocystis sp. (strain PCC 6803 / Kazusa) OX=1111708 GN=apcF PE=1 SV=1	41.42	7	4480	18892.4				0
P23350	RL10_SYNY3	Large ribosomal subunit protein uL10 OS=Synechocystis sp. (strain PCC 6803 / Kazusa) OX=1111708 GN=rplJ PE=3 SV=1	99.42	23	37400	18675.6				0
P54225	HEMH_SYNY3	Ferrochelatase OS=Synechocystis sp. (strain PCC 6803 / Kazusa) OX=1111708 GN=hemH PE=1 SV=1	4.65	2	212	43924.4				0
Q57417	ACCD_SYNY3	Acetyl-coenzyme A carboxylase carboxyl transferase subunit beta OS=Synechocystis sp. (strain PCC 6803 / Kazusa) OX=1111708 GN=accD PE=3 SV=1	28.83	7	4110	36395.9				0
P73310	RL14_SYNY3	Large ribosomal subunit protein uL14 OS=Synechocystis sp. (strain PCC 6803 / Kazusa) OX=1111708 GN=rplN PE=1 SV=1	100	24	99900	13294.5				0
P73336	RS20_SYNY3	Small ribosomal subunit protein bS20 OS=Synechocystis sp. (strain PCC 6803 / Kazusa) OX=1111708 GN=rpsT PE=3 SV=1	83.51	20	75100	10702.6				0
P48958	RL33_SYNY3	Large ribosomal subunit protein bL33 OS=Synechocystis sp. (strain PCC 6803 / Kazusa) OX=1111708 GN=rpmG PE=3 SV=1	49.23	2	4920	7548.79				0
P73290	PURA_SYNY3	Adenylosuccinate synthetase OS=Synechocystis sp. (strain PCC 6803 / Kazusa) OX=1111708 GN=purA PE=3 SV=2	4.05	2	182	48792.8				0
P73346	Y1118_SYNY3	UPF0145 protein sll118 OS=Synechocystis sp. (strain PCC 6803 / Kazusa) OX=1111708 GN=sll1118 PE=3 SV=1	60.19	7	14000	11449.9				0
Q05972	CH601_SYNY3	Chaperonin GroEL 1 OS=Synechocystis sp. (strain PCC 6803 / Kazusa) OX=1111708 GN=groEL1 PE=1 SV=4	40.3	18	17400	57652.7	6.47	2		0
P73316	RS19_SYNY3	Small ribosomal subunit protein uS19 OS=Synechocystis sp. (strain PCC 6803 / Kazusa) OX=1111708 GN=rpsS PE=3 SV=1	85.87	12	97100	10290				0
Q55195	PSTB2_SYNY3	Phosphate import ATP-binding protein PstB 2 OS=Synechocystis sp. (strain PCC 6803 / Kazusa) OX=1111708 GN=pstB2 PE=3 SV=1	25.56	4	1080	29244.4				0
P74361	CLPB2_SYNY3	Chaperone protein ClpB 2 OS=Synechocystis sp. (strain PCC 6803 / Kazusa) OX=1111708 GN=clpB2 PE=3 SV=1	4.24	3	332	98122.5				0
P54386	DHE4_SYNY3	NADP-specific glutamate dehydrogenase OS=Synechocystis sp. (strain PCC 6803 / Kazusa) OX=1111708 GN=gdhA PE=3 SV=1	11.21	4	769	47312.7				0
P52208	6PGD_SYNY3	6-phosphogluconate dehydrogenase, decarboxylating OS=Synechocystis sp. (strain PCC 6803 / Kazusa) OX=1111708 GN=gnd PE=3 SV=1	15.15	7	5140	52873.5				0
P73321	Y1894_SYNY3	Protein slr1894 OS=Synechocystis sp. (strain PCC 6803 / Kazusa) OX=1111708 GN=slr1894 PE=1 SV=1	14.74	2	510	17755.3				0
Q55318	FENR_SYNY3	Ferredoxin--NADP reductase OS=Synechocystis sp. (strain PCC 6803 / Kazusa) OX=1111708 GN=petH PE=1 SV=2	33.66	11	10400	46359.5				0
P74142	RS1B_SYNY3	Small ribosomal subunit protein bS1B OS=Synechocystis sp. (strain PCC 6803 / Kazusa) OX=1111708 GN=rps1b PE=3 SV=1	26.23	5	1310	33795				0
Q55499	SSB1_SYNY3	Single-stranded DNA-binding protein 1 OS=Synechocystis sp. (strain PCC 6803 / Kazusa) OX=1111708 GN=ssb PE=3 SV=1	80.99	9	13200	13656.3				0
Q01950	PYC1_SYNY3	Phycobilisome 7.8 kDa linker polypeptide, allophycocyanin-associated, core OS=Synechocystis sp. (strain PCC 6803 / Kazusa) OX=1111708 GN=apcC PE=1 SV=1	34.33	2	2630	7706.02				0
P74267	RL27_SYNY3	Large ribosomal subunit protein bL27 OS=Synechocystis sp. (strain PCC 6803 / Kazusa) OX=1111708 GN=rpmA PE=3 SV=1	32.18	3	7240	9448.66				0
P73954	Y1513_SYNY3	Membrane-associated protein slr1513 OS=Synechocystis sp. (strain PCC 6803 / Kazusa) OX=1111708 GN=slr1513 PE=1 SV=1	41.82	4	3630	12006.8				0
P74638	ACCA_SYNY3	Acetyl-coenzyme A carboxylase carboxyl transferase subunit alpha OS=Synechocystis sp. (strain PCC 6803 / Kazusa) OX=1111708 GN=accA PE=3 SV=1	30.37	6	1550	36042.4				0
Q55746	LPXA_SYNY3	Acyl-[acyl-carrier-protein]--UDP-N-acetylglucosamine O-acyltransferase OS=Synechocystis sp. (strain PCC 6803 / Kazusa) OX=1111708 GN=lpxA PE=3 SV=2	45.65	11	4550	30002.2				0
P72760	CCMK1_SYNY3	Carboxysome shell protein CcmK1 OS=Synechocystis sp. (strain PCC 6803 / Kazusa) OX=1111708 GN=ccmK1 PE=1 SV=3	90.99	7	7160	12102				0
Q55621	PUR1_SYNY3	Amidophosphoribosyltransferase OS=Synechocystis sp. (strain PCC 6803 / Kazusa) OX=1111708 GN=purF PE=3 SV=1	11.31	4	505	53670.1				0
Q55544	APCE_SYNY3	Phycobiliprotein ApcE OS=Synechocystis sp. (strain PCC 6803 / Kazusa) OX=1111708 GN=apcE PE=1 SV=1	66.18	72	65700	100296				0
P19125	NDHJ_SYNY3	NAD(P)H-quinone oxidoreductase subunit J OS=Synechocystis sp. (strain PCC 6803 / Kazusa) OX=1111708 GN=ndhJ PE=1 SV=4	40.22	6	3490	20593.2				0
